# Supplementary material for: Classification and Identification of Pinecone Mulching in Blueberry Cultivation Based on Crop Leaf Characteristics and Hyperspectral Data
Source: MDPI journal article supplement (doi:10.3390/agronomy14040785), 2024-04-10
Supplement: s1 [file s1]

Archive with 5 entries (5 files):
- agronomy-2938082-supplementary/Supplementary Figure S1.pdf
- agronomy-2938082-supplementary/Supplementary Table S1.pdf
- agronomy-2938082-supplementary/Supplementary Table S2.pdf
- agronomy-2938082-supplementary/Supplementary Table S3.pdf
- agronomy-2938082-supplementary/Supplementary Table S4.pdf
