# Supplementary material for: Classification and Identification of Pinecone Mulching in Blueberry Cultivation Based on Crop Leaf Characteristics and Hyperspectral Data
Source: MDPI journal article supplement (doi:10.3390/agronomy14040785), 2024-04-10
Supplement: s1 [file s1]

**Supplementary Table S3.** The evaluation results of the classification model of VNIR.

|         |           |            | NM    | PC    | PCS   | PN    | S     |
|---------|-----------|------------|-------|-------|-------|-------|-------|
| PLS-DA  | Precision | P.M.P      | 0.938 | 0.919 | 0.889 | 0.9   | 0.938 |
|         |           | Thres: 0.5 | 0.973 | 0.945 | 0.954 | 0.914 | 0.965 |
|         | Recall    | P.M.P      | 0.633 | 0.857 | 0.755 | 0.678 | 0.735 |
|         |           | Thres: 0.5 | 0.433 | 0.302 | 0.628 | 0.352 | 0.082 |
|         | Accuracy  | P.M.P      | 0.796 | 0.89  | 0.83  | 0.801 | 0.843 |
|         |           | Thres: 0.5 | 0.711 | 0.642 | 0.799 | 0.659 | 0.539 |
|         | FPR       | P.M.P      | 0.042 | 0.076 | 0.094 | 0.075 | 0.048 |
|         |           | Thres: 0.5 | 0.012 | 0.018 | 0.03  | 0.033 | 0.003 |
|         | F1 score  | P.M.P      | 0.756 | 0.887 | 0.817 | 0.774 | 0.824 |
|         |           | Thres: 0.5 | 0.6   | 0.457 | 0.758 | 0.508 | 0.151 |
| XGBoost | Precision | P.M.P      | 0.992 | 0.991 | 0.995 | 0.993 | 0.997 |
|         |           | Thres: 0.5 | 0.992 | 0.992 | 0.996 | 0.993 | 0.997 |
|         | Recall    | P.M.P      | 0.967 | 0.978 | 0.99  | 0.973 | 0.968 |
|         |           | Thres: 0.5 | 0.967 | 0.978 | 0.99  | 0.973 | 0.963 |
|         | Accuracy  | P.M.P      | 0.98  | 0.985 | 0.993 | 0.983 | 0.983 |
|         |           | Thres: 0.5 | 0.98  | 0.985 | 0.993 | 0.983 | 0.98  |
|         | FPR       | P.M.P      | 0.008 | 0.009 | 0.005 | 0.007 | 0.003 |
|         |           | Thres: 0.5 | 0.008 | 0.008 | 0.004 | 0.007 | 0.003 |
|         | F1 score  | P.M.P      | 0.979 | 0.984 | 0.993 | 0.983 | 0.982 |
|         |           | Thres: 0.5 | 0.979 | 0.985 | 0.993 | 0.983 | 0.98  |

NM: non-mulching, PCs: crushed pinecones, PCS: a mixture of crushed pinecones and sulfur, PNs: pine needles, and S: sulfur treatment.
