# Supplementary material for: Classification and Identification of Pinecone Mulching in Blueberry Cultivation Based on Crop Leaf Characteristics and Hyperspectral Data
Source: MDPI journal article supplement (doi:10.3390/agronomy14040785), 2024-04-10
Supplement: s1 [file s1]

**Supplementary Table S1.** The evaluation results of the classification model of leaf growth and physiology.

|         |           |            | NM    | PC    | PCS   | PN    | S     |
|---------|-----------|------------|-------|-------|-------|-------|-------|
| PLS-DA  | Precision | P.M.P      | 0.902 | 0.8   | 0.8   | 0.732 | 0.846 |
|         |           | Thres: 0.5 | 0.968 | 0.813 | 0.571 | 0.667 | 0.892 |
|         | Recall    | P.M.P      | 0.617 | 0.567 | 0.533 | 0.217 | 0.8   |
|         |           | Thres: 0.5 | 0.25  | 0.217 | 0.017 | 0.05  | 0.55  |
|         | Accuracy  | P.M.P      | 0.775 | 0.713 | 0.7   | 0.569 | 0.827 |
|         |           | Thres: 0.5 | 0.621 | 0.583 | 0.502 | 0.513 | 0.742 |
|         | FPR       | P.M.P      | 0.067 | 0.142 | 0.133 | 0.079 | 0.146 |
|         |           | Thres: 0.5 | 0.008 | 0.05  | 0.013 | 0.025 | 0.067 |
|         | F1 score  | P.M.P      | 0.733 | 0.663 | 0.64  | 0.334 | 0.822 |
|         |           | Thres: 0.5 | 0.397 | 0.342 | 0.032 | 0.093 | 0.68  |
| XGBoost | Precision | P.M.P      | 0.939 | 0.897 | 0.88  | 0.767 | 0.907 |
|         |           | Thres: 0.5 | 0.949 | 0.895 | 0.889 | 0.795 | 0.906 |
|         | Recall    | P.M.P      | 0.7   | 0.583 | 0.583 | 0.55  | 0.817 |
|         |           | Thres: 0.5 | 0.7   | 0.567 | 0.533 | 0.55  | 0.767 |
|         | Accuracy  | P.M.P      | 0.827 | 0.758 | 0.752 | 0.692 | 0.867 |
|         |           | Thres: 0.5 | 0.831 | 0.75  | 0.733 | 0.704 | 0.844 |
|         | FPR       | P.M.P      | 0.046 | 0.067 | 0.079 | 0.167 | 0.083 |
|         |           | Thres: 0.5 | 0.038 | 0.067 | 0.067 | 0.142 | 0.079 |
|         | F1 score  | P.M.P      | 0.802 | 0.707 | 0.702 | 0.641 | 0.86  |
|         |           | Thres: 0.5 | 0.806 | 0.694 | 0.667 | 0.65  | 0.831 |

NM: non-mulching, PCs: crushed pinecones, PCS: a mixture of crushed pinecones and sulfur, PNs: pine needles, and S: sulfur treatment.
