# Supplementary material for: Classification and Identification of Pinecone Mulching in Blueberry Cultivation Based on Crop Leaf Characteristics and Hyperspectral Data
Source: MDPI journal article supplement (doi:10.3390/agronomy14040785), 2024-04-10
Supplement: s1 [file s1]

**Supplementary Table S2.** The evaluation results of the classification model of VIs.

|         |           |            | NM    | PC    | PCS   | PN    | S     |
|---------|-----------|------------|-------|-------|-------|-------|-------|
| PLS-DA  | Precision | P.M.P      | 0.723 | 0.8   | 0.839 | 0.702 | 0.811 |
|         |           | Thres: 0.5 | 0.786 | 0.667 | 0.841 | 0.742 | 0.701 |
|         | Recall    | P.M.P      | 0.312 | 0.61  | 0.563 | 0.277 | 0.647 |
|         |           | Thres: 0.5 | 0.135 | 0.007 | 0.122 | 0.06  | 0.073 |
|         | Accuracy  | P.M.P      | 0.596 | 0.729 | 0.728 | 0.58  | 0.748 |
|         |           | Thres: 0.5 | 0.549 | 0.502 | 0.549 | 0.52  | 0.521 |
|         | FPR       | P.M.P      | 0.119 | 0.153 | 0.108 | 0.118 | 0.15  |
|         |           | Thres: 0.5 | 0.037 | 0.003 | 0.023 | 0.021 | 0.031 |
|         | F1 score  | P.M.P      | 0.436 | 0.692 | 0.674 | 0.397 | 0.72  |
|         |           | Thres: 0.5 | 0.23  | 0.013 | 0.213 | 0.111 | 0.133 |
| XGBoost | Precision | P.M.P      | 0.921 | 0.941 | 0.919 | 0.909 | 0.932 |
|         |           | Thres: 0.5 | 0.932 | 0.948 | 0.93  | 0.924 | 0.941 |
|         | Recall    | P.M.P      | 0.712 | 0.772 | 0.762 | 0.732 | 0.793 |
|         |           | Thres: 0.5 | 0.653 | 0.752 | 0.728 | 0.677 | 0.768 |
|         | Accuracy  | P.M.P      | 0.825 | 0.862 | 0.847 | 0.829 | 0.868 |
|         |           | Thres: 0.5 | 0.803 | 0.855 | 0.837 | 0.81  | 0.86  |
|         | FPR       | P.M.P      | 0.061 | 0.048 | 0.067 | 0.073 | 0.058 |
|         |           | Thres: 0.5 | 0.048 | 0.041 | 0.055 | 0.056 | 0.048 |
|         | F1 score  | P.M.P      | 0.803 | 0.848 | 0.833 | 0.811 | 0.857 |
|         |           | Thres: 0.5 | 0.768 | 0.839 | 0.817 | 0.781 | 0.846 |

NM: non-mulching, PCs: crushed pinecones, PCS: a mixture of crushed pinecones and sulfur, PNs: pine needles, and S: sulfur treatment.
