# Supplementary material for: Classification and Identification of Pinecone Mulching in Blueberry Cultivation Based on Crop Leaf Characteristics and Hyperspectral Data
Source: MDPI journal article supplement (doi:10.3390/agronomy14040785), 2024-04-10
Supplement: s1 [file s1]

**Supplementary Table S4.** The evaluation results of the classification model of SWIR.

|         |           |            | NM    | PC    | PCS   | PN    | S     |
|---------|-----------|------------|-------|-------|-------|-------|-------|
| PLS-DA  | Precision | P.M.P      | 0.709 | 0.872 | 0.674 | 0.633 | 0.807 |
|         |           | Thres: 0.5 | 1     | 0.976 | 0     | 0.623 | 1     |
|         | Recall    | P.M.P      | 0.388 | 0.688 | 0.202 | 0.407 | 0.48  |
|         |           | Thres: 0.5 | 0.002 | 0.337 | 0     | 0.163 | 0.012 |
|         | Accuracy  | P.M.P      | 0.615 | 0.794 | 0.552 | 0.585 | 0.683 |
|         |           | Thres: 0.5 | 0.501 | 0.664 | 0.5   | 0.532 | 0.506 |
|         | FPR       | P.M.P      | 0.159 | 0.101 | 0.098 | 0.236 | 0.115 |
|         |           | Thres: 0.5 | 0     | 0.008 | 0     | 0.099 | 0     |
|         | F1 score  | P.M.P      | 0.502 | 0.769 | 0.31  | 0.495 | 0.602 |
|         |           | Thres: 0.5 | 0.003 | 0.501 | 0     | 0.259 | 0.023 |
| XGBoost | Precision | P.M.P      | 0.987 | 0.994 | 0.985 | 0.99  | 0.989 |
|         |           | Thres: 0.5 | 0.989 | 0.994 | 0.986 | 0.992 | 0.989 |
|         | Recall    | P.M.P      | 0.978 | 0.977 | 0.948 | 0.938 | 0.947 |
|         |           | Thres: 0.5 | 0.978 | 0.973 | 0.943 | 0.932 | 0.947 |
|         | Accuracy  | P.M.P      | 0.983 | 0.985 | 0.967 | 0.965 | 0.968 |
|         |           | Thres: 0.5 | 0.984 | 0.984 | 0.965 | 0.962 | 0.968 |
|         | FPR       | P.M.P      | 0.013 | 0.006 | 0.015 | 0.009 | 0.01  |
|         |           | Thres: 0.5 | 0.011 | 0.005 | 0.013 | 0.008 | 0.01  |
|         | F1 score  | P.M.P      | 0.983 | 0.985 | 0.966 | 0.964 | 0.967 |
|         |           | Thres: 0.5 | 0.983 | 0.984 | 0.964 | 0.961 | 0.967 |

NM: non-mulching, PCs: crushed pinecones, PCS: a mixture of crushed pinecones and sulfur, PNs: pine needles, and S: sulfur treatment.
