# Supplementary figures and images for: Classification and Identification of Pinecone Mulching in Blueberry Cultivation Based on Crop Leaf Characteristics and Hyperspectral Data
Source: MDPI journal article supplement (doi:10.3390/agronomy14040785), 2024-04-10

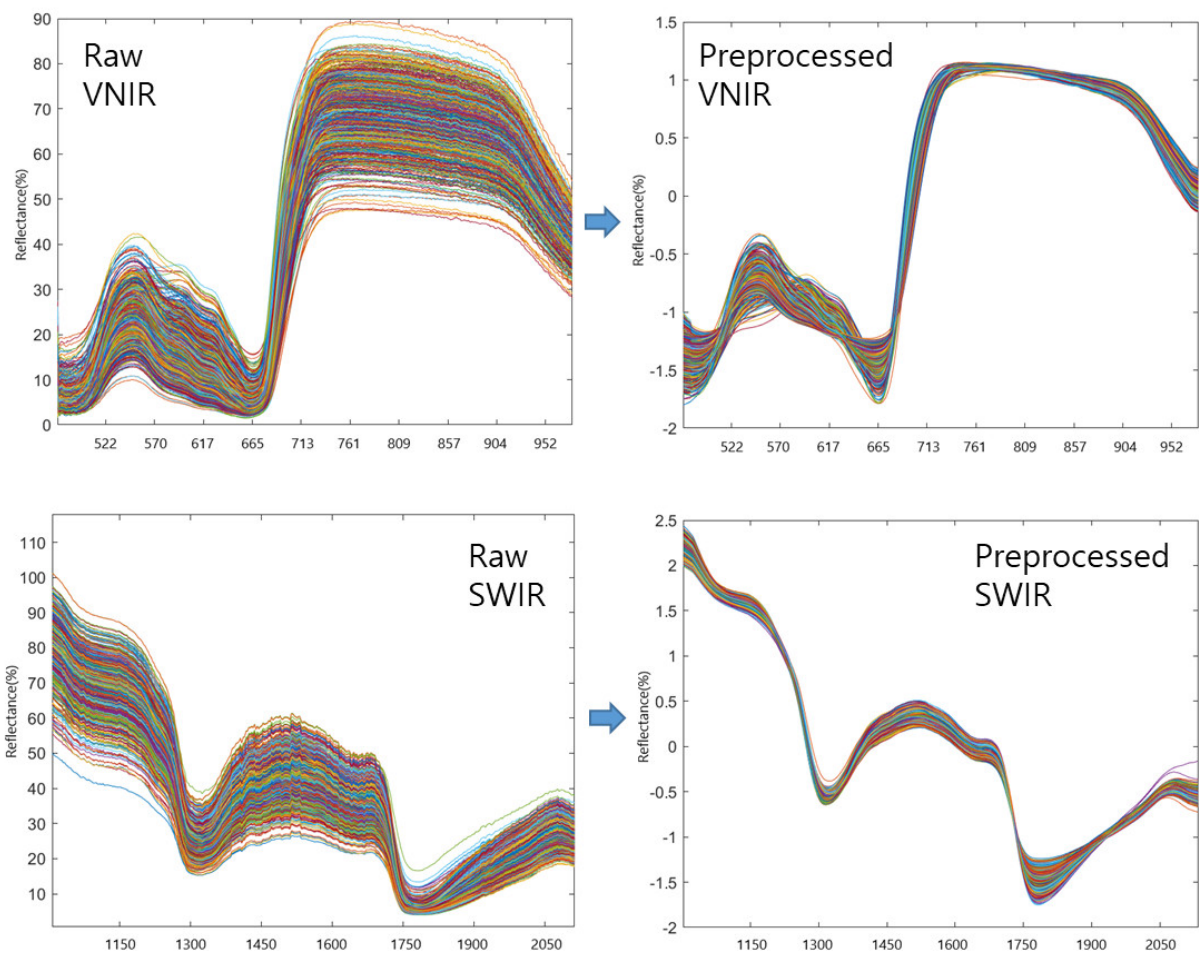

**Supplementary Figure S1.** Spectra preprocessing before and after.

Supplement: s1 [file s1 › agronomy-2938082-supplementary/Supplementary Figure S1.pdf]
